# Supplementary material for: Non-target mass spectrometry analysis of NDMA precursors in advanced treatment for potable reuse
Source: Royal Society of Chemistry journal article supplement (doi:10.1039/c8ew00401c), 2018-01-01
Supplement: c8ew00401c1.pdf [file c8ew00401c1.pdf]

## Supporting Information

### 1. Precursor recovery (Section 2.3)

Recovery of NDMA precursors varied in the isolates from 63% to greater than 100% (Table 1 in main text). High recovery of precursors may be explained by low level contamination from the reagents, or column contamination. Although the Milli-Q control samples generally did not contain NDMA or NDMA FP, the isolates of Milli-Q water ranged from 0 to 5 ng/L of NDMA FP. Therefore, it is possible that the cartridge itself or reagents used during isolation may contribute NDMA or NDMA precursors.

In cases where the initial NDMA ( $T_0$  NDMA, Table 1) was similar to NDMA FP, the high recovery of precursors may be partially explained by NDMA present in the initial samples that sorbed and eluted from the MCX cartridge. Based on the pKa of the NDMA nitroso group (3.5) and the pH during column loading (3), approximately 77% of the initial NDMA may have been retained (Chemicalize.org 2016), eluted into the isolate, and contributed to the reconstituted NDMA FP measurements. For example, the RO permeate from the older membranes in the first sampling event had precursor recovery in the isolate of 170% if we assume the initial NDMA is poorly extracted, but 77% when NDMA ionization and partial retention is considered (Table 1). However, applying the same assumptions of recovery of initial NDMA to other samples results in a calculated 0% recovery (all isolated NDMA FP is from NDMA present in the sample that is sorbed and eluted from the extraction columns).

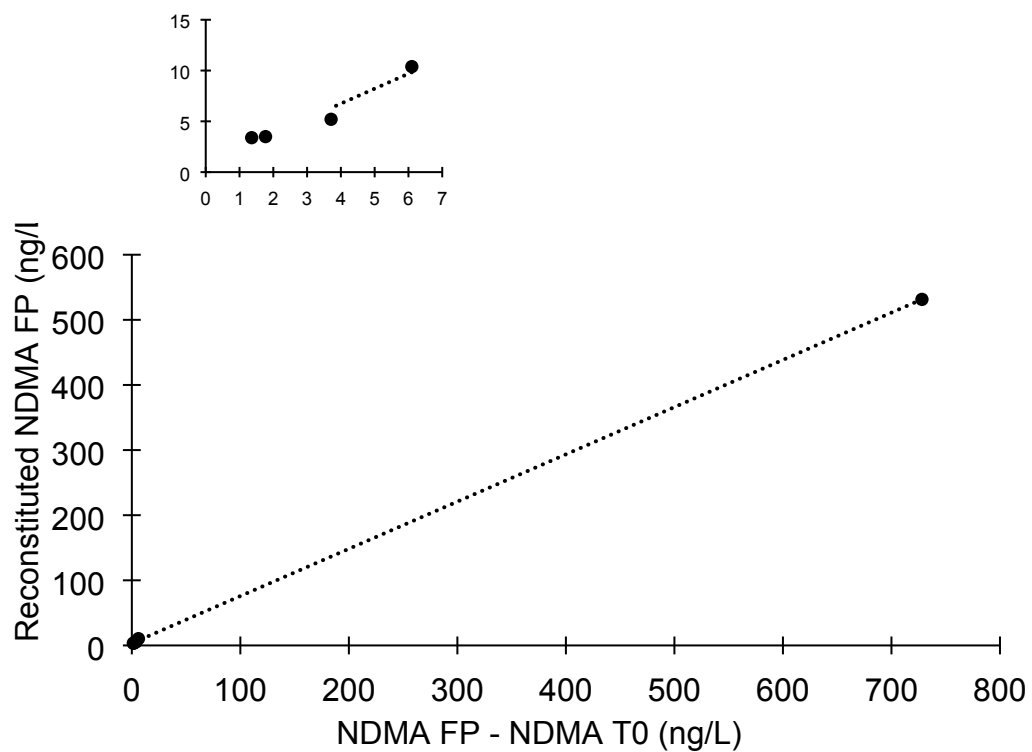

Figure SI-1. Comparison of NDMA FP of the as-collected samples versus the reconstituted isolate NDMA FP for the first sampling campaign. Inset shows linear correlation for samples with NDMA FP <15 ng/L.

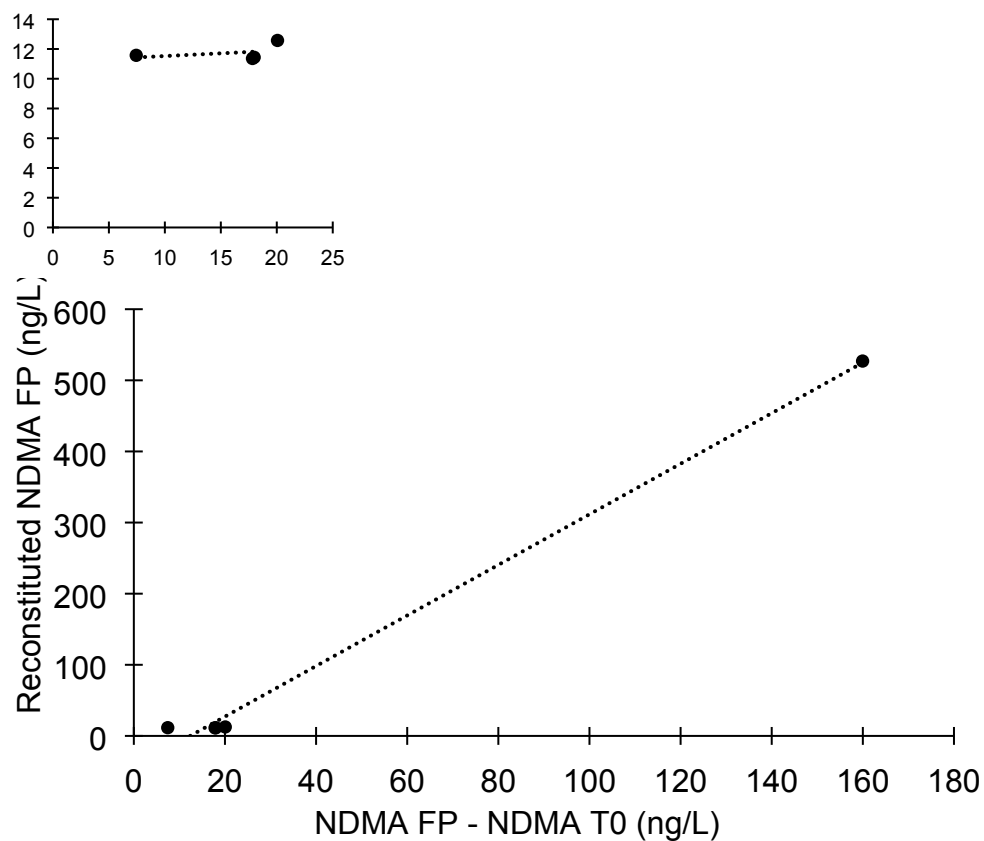

Figure SI-2. Comparison of NDMA FP of the as-collected samples versus the reconstituted isolate NDMA FP for the second sampling campaign. Inset shows linear correlation for samples with NDMA FP <15 ng/L.

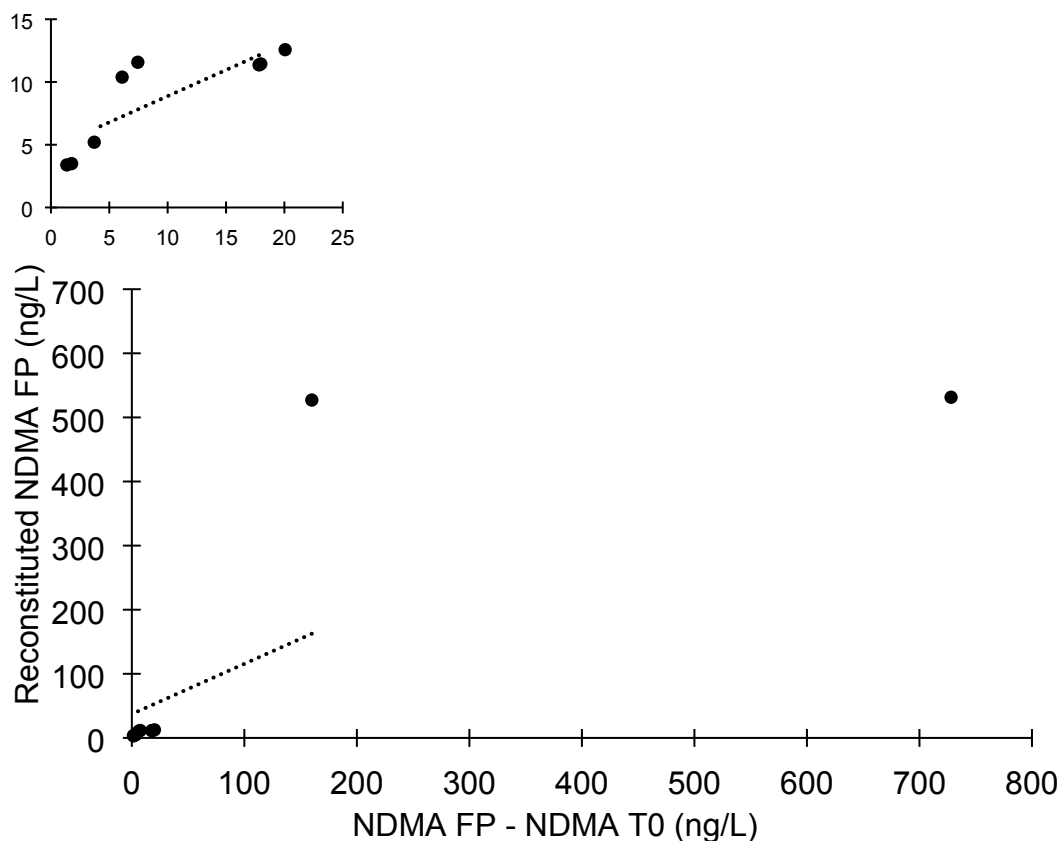

Figure SI-3. Combined data sets and regressions for comparison of NDMA FP of the as-collected samples versus the reconstituted isolate NDMA FP. Inset shows linear correlation for samples with NDMA FP <15 ng/L.

Table SI-1. RPD and percent recovery values for extraction procedure

|                             | C <sub>0</sub><br>NDMA<br>(ng/L) | C <sub>3</sub><br>(after<br>chloramination<br>) NDMA<br>(ng/L) | RPD | NDMA<br>FP<br>(C <sub>3</sub> – C <sub>0</sub> )<br>(ng/L) | Reconstituted<br>isolate NDMA<br>FP (ng/L) | RPD | Percent<br>recovery |
|-----------------------------|----------------------------------|----------------------------------------------------------------|-----|------------------------------------------------------------|--------------------------------------------|-----|---------------------|
| <b>First Sampling Event</b> |                                  |                                                                |     |                                                            |                                            |     |                     |
| MFE                         | 19                               | 747                                                            | NA  | 728                                                        | 531                                        | 9%  | 73%                 |
| ROP<br>Older                | 7                                | 14                                                             | NA  | 6                                                          | 10                                         | 45% | >100%               |
| ROP<br>Newer                | 6                                | 7                                                              | NA  | 1                                                          | 3                                          | 1%  | >100%               |
| ROP<br>Bulk                 | 6                                | 7                                                              | NA  | 2                                                          | 3                                          | 10% | >100%               |
| UVP                         | ND                               | 4                                                              | NA  | 4                                                          | 5                                          | 13% | >100%               |

|                              |    |     |          |     |     |      |       |
|------------------------------|----|-----|----------|-----|-----|------|-------|
| Milli-Q                      | 0  | 0   | NA       | NA  | 5   | 11%  | >100% |
| <b>Second Sampling Event</b> |    |     |          |     |     |      |       |
| MFE                          | 44 | 204 | 17%      | 160 | 527 | 3%   | >100% |
| ROP<br>Older                 | 21 | 39  | 1%       | 18  | 11  | 2%   | 64%   |
| ROP<br>Newer                 | 16 | 34  | 4%       | 18  | 11  | 1%   | 64%   |
| ROP<br>Bulk                  | 13 | 33  | 5%       | 20  | 13  | 8%   | 63%   |
| UVP                          | 3  | 10  | 2%       | 7   | 12  | 9%   | >100% |
| Milli-Q                      | 0  | 3   | 100<br>% | 3   | 5   | 100% | >100% |

## 2. Investigation of total ion chromatograms (Section 3.4)

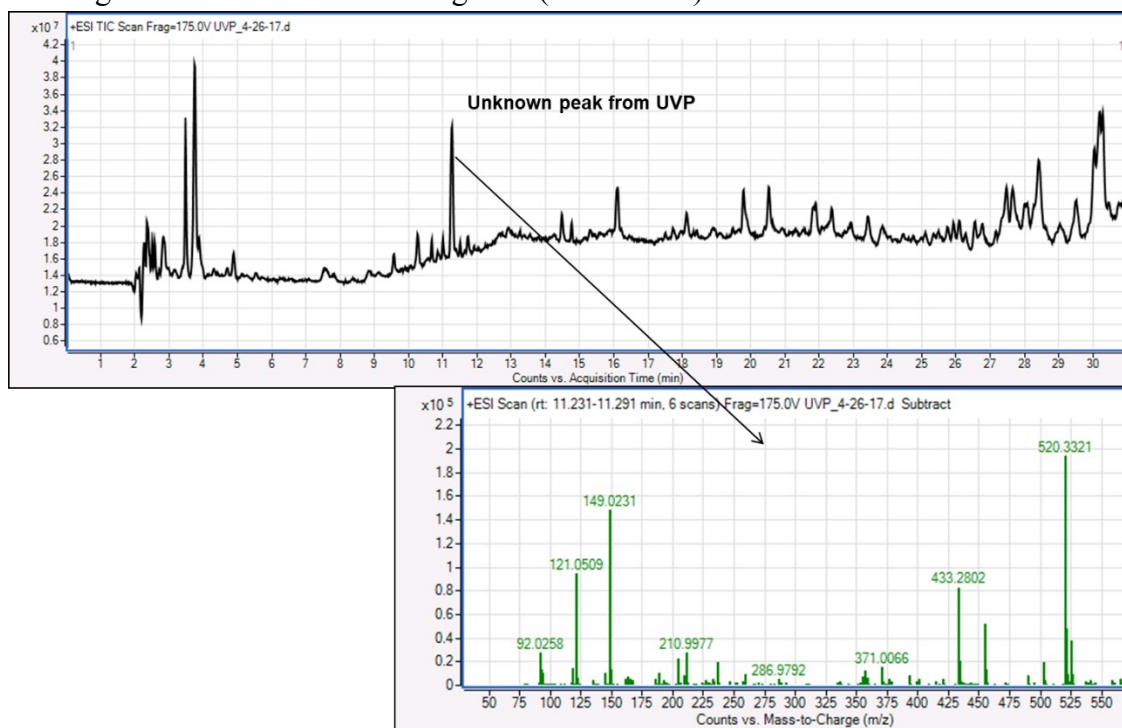

Figure SI-4. Mass spectrum of unknown in UV effluent sample

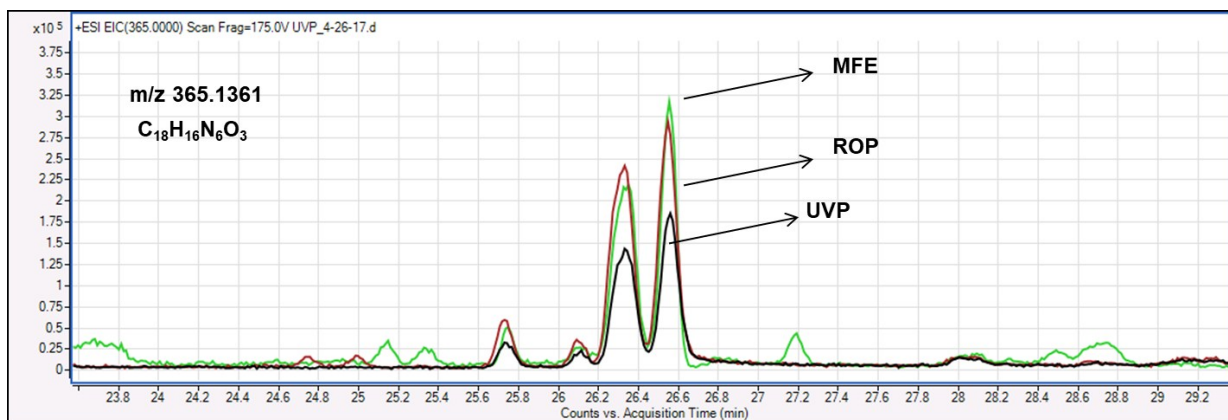

Figure SI-5. Possible trimer in samples for Event 2.

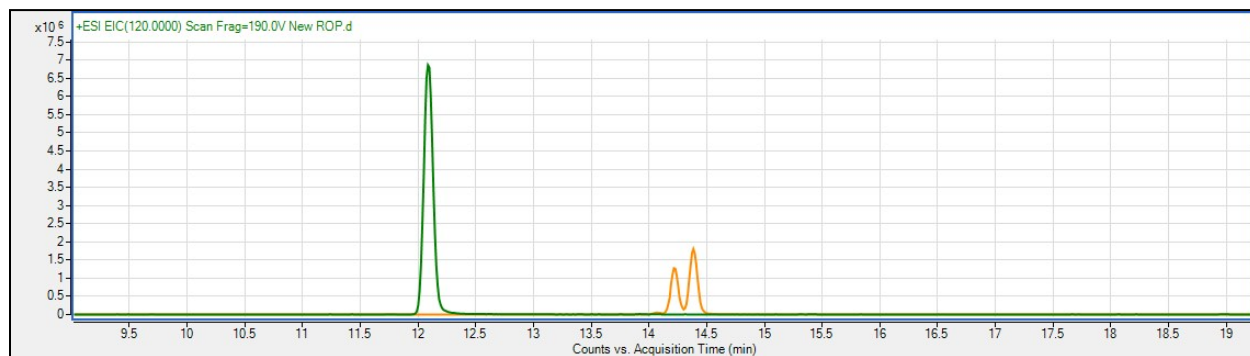

Figure SI-6. Benzotriazole (green, m/z 120 EIC) and methylbenzotriazole isomers (yellow, m/z 134 EIC) in permeate from the newer membrane and UV permeate sample in event one, respectively.

Figure 6 shows the UV permeate and new membrane permeate TICs from the first event. These show a compound removed at approximately 12 minutes by UV/AOP treatment and the appearance of a set of isomers at 26-27 min with a single mass of m/z 365.1361. The peak at 12.0 minutes has a mass of m/z 120.0484. This compound was tentatively identified as benzotriazole, a common compound in wastewater that is used in dishwasher detergent as a corrosion inhibitor and is also contained in aircraft deicing fluids [12]. Its companion compound, methylbenzotriazole, at m/z 134 is also present in the ROP-New sample as two isomers (Figure 7). Both of these compounds are removed by UV/AOP treatment.

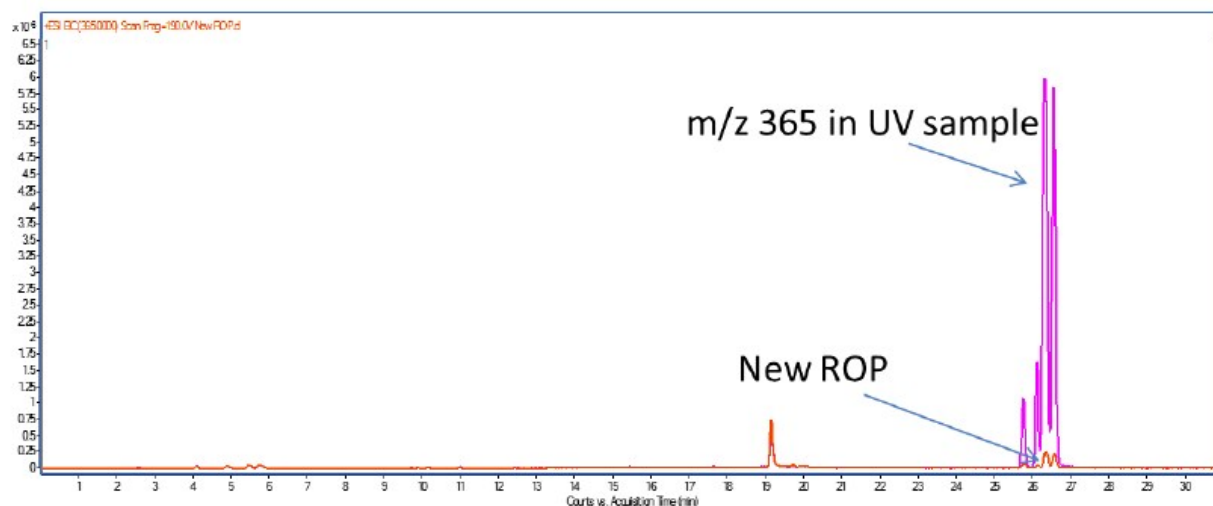

Figure SI-7. UV effluent sample (pink) has large m/z 365 peaks (benzotriazole isomers). Permeate from a newer membrane (orange) has trace levels.

However, in this event, it appears that their removal may actually be polymerization into a series of isomers at m/z 365 (7). The identity and structures of the m/z 365 ions are not known, but have the formula of  $C_{18}H_{16}N_6O_3$ , which is consistent with the replacement of one of the nitrogen atoms with oxygen and the formation of a trimer of the m/z 120 ion. Figure 8 shows that the m/z 365 ion is a major ion in the UV permeate sample and at a trace level in the new membrane permeate. Published literature does not show that benzotriazole forms a trimer during UV exposure alone, but the literature does not include any research related to UV/AOP, where oxidation is more likely.

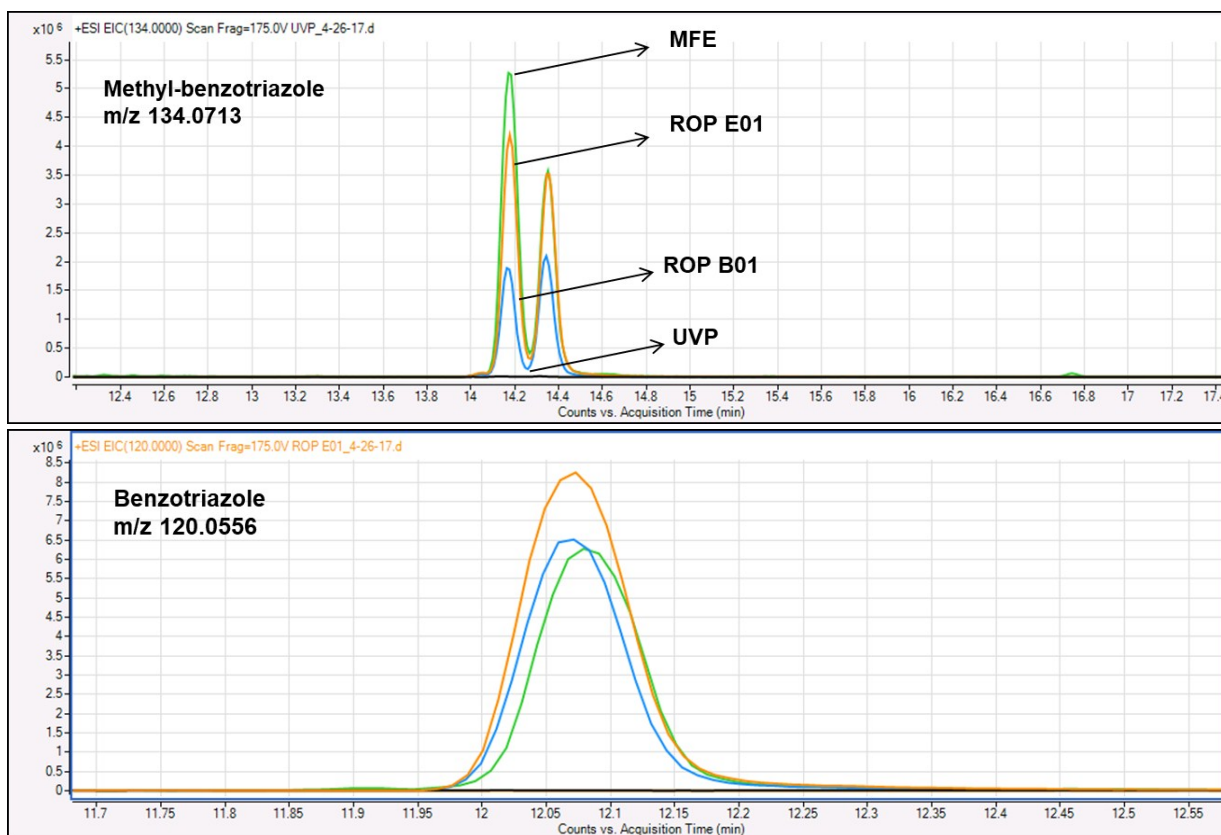

Figure SI-8. Methyl-benzotriazole and benzotriazoles in samples from event two

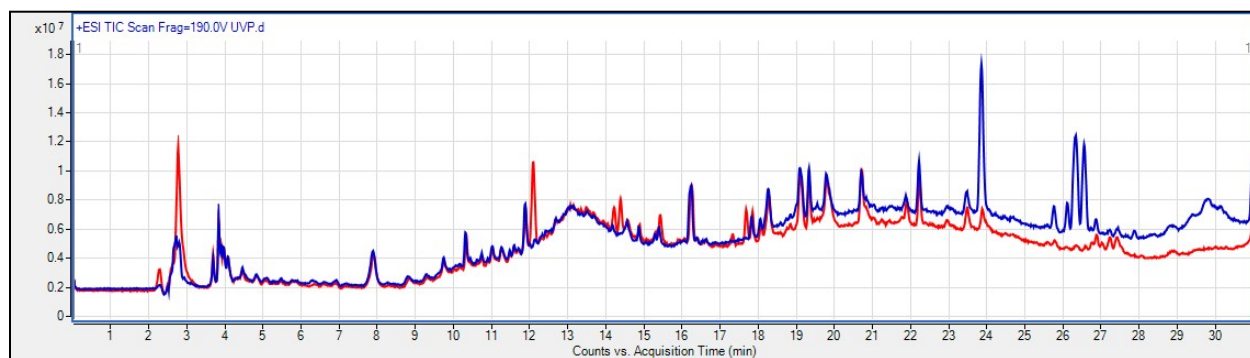

Figure SI-9. Permeate from a newer membrane (red) and UV effluent (Blue), total ion chromatogram.



### 3. Auto MS-MS analysis to detect known or potential NDMA precursors (Section 3.5)

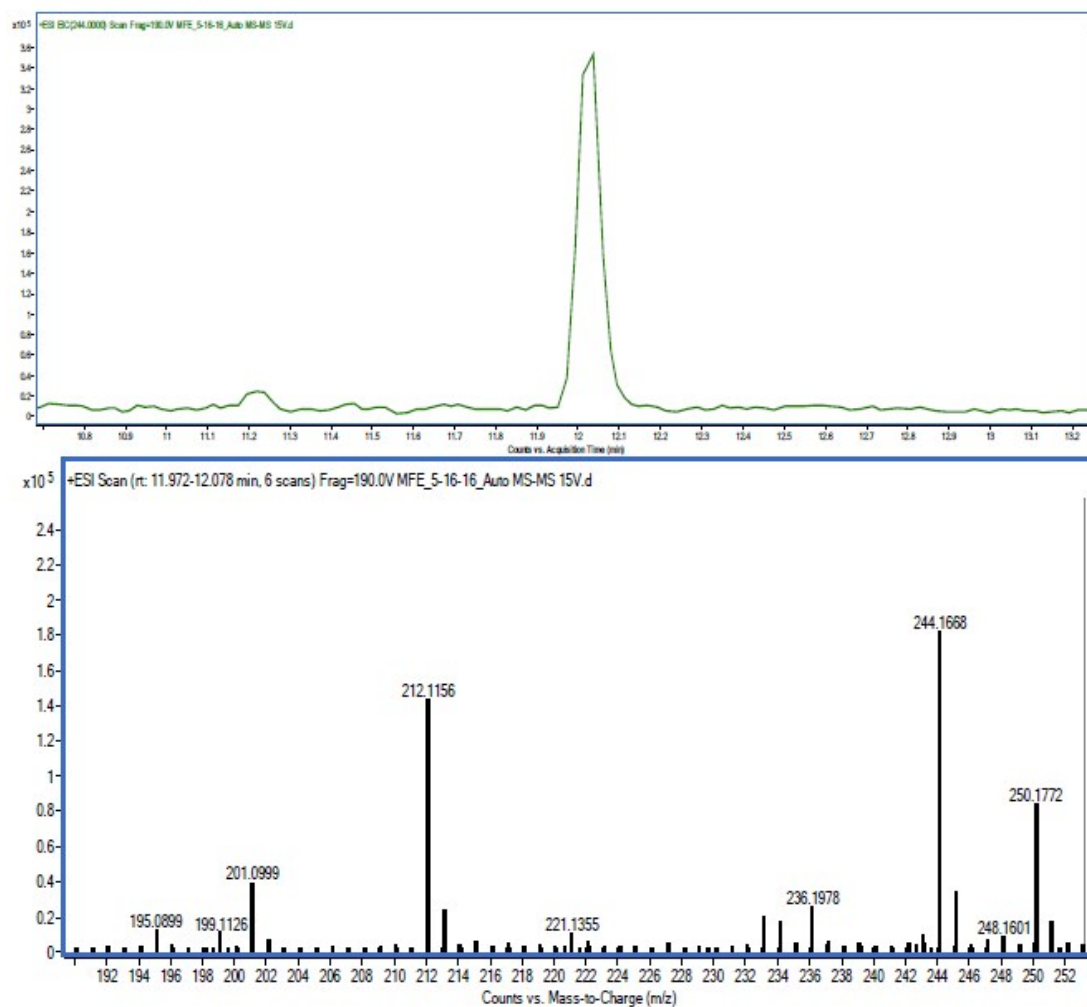

Figure SI-10. Top panel shows a chromatographic peak in the microfiltration effluent sample. The lower panel shows the mass spectrum with two peaks separated by a neutral loss of 45.06 u at 12 min during auto MS-MS ( $m/z$  244 and  $m/z$  199). This spectrum also shows the fragmentation pattern of the 244.1668  $m/z$  ion, which is consistent with 3-hydroxymorphinan.

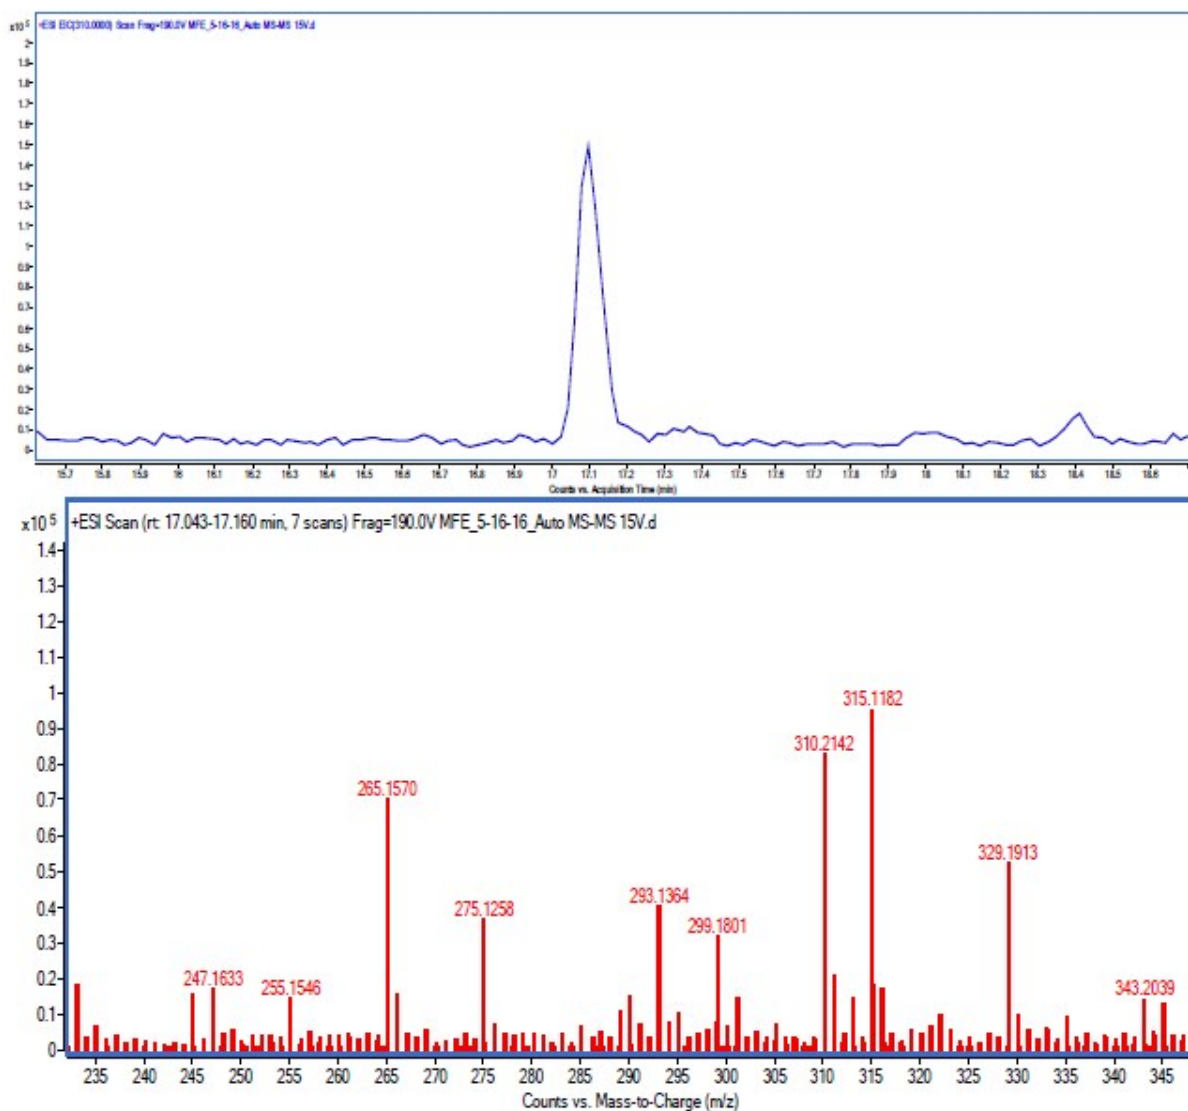

Figure SI-11. Top panel shows a chromatographic peak in the microfiltration effluent sample. The lower panel shows the mass spectrum with two peaks separated by a neutral loss of 45.06 u at 17.1 min during auto MS-MS ( $m/z$  310 and  $m/z$  265). This spectrum also shows the fragmentation pattern of the 310.2142  $m/z$  ion, which is consistent with methadone.

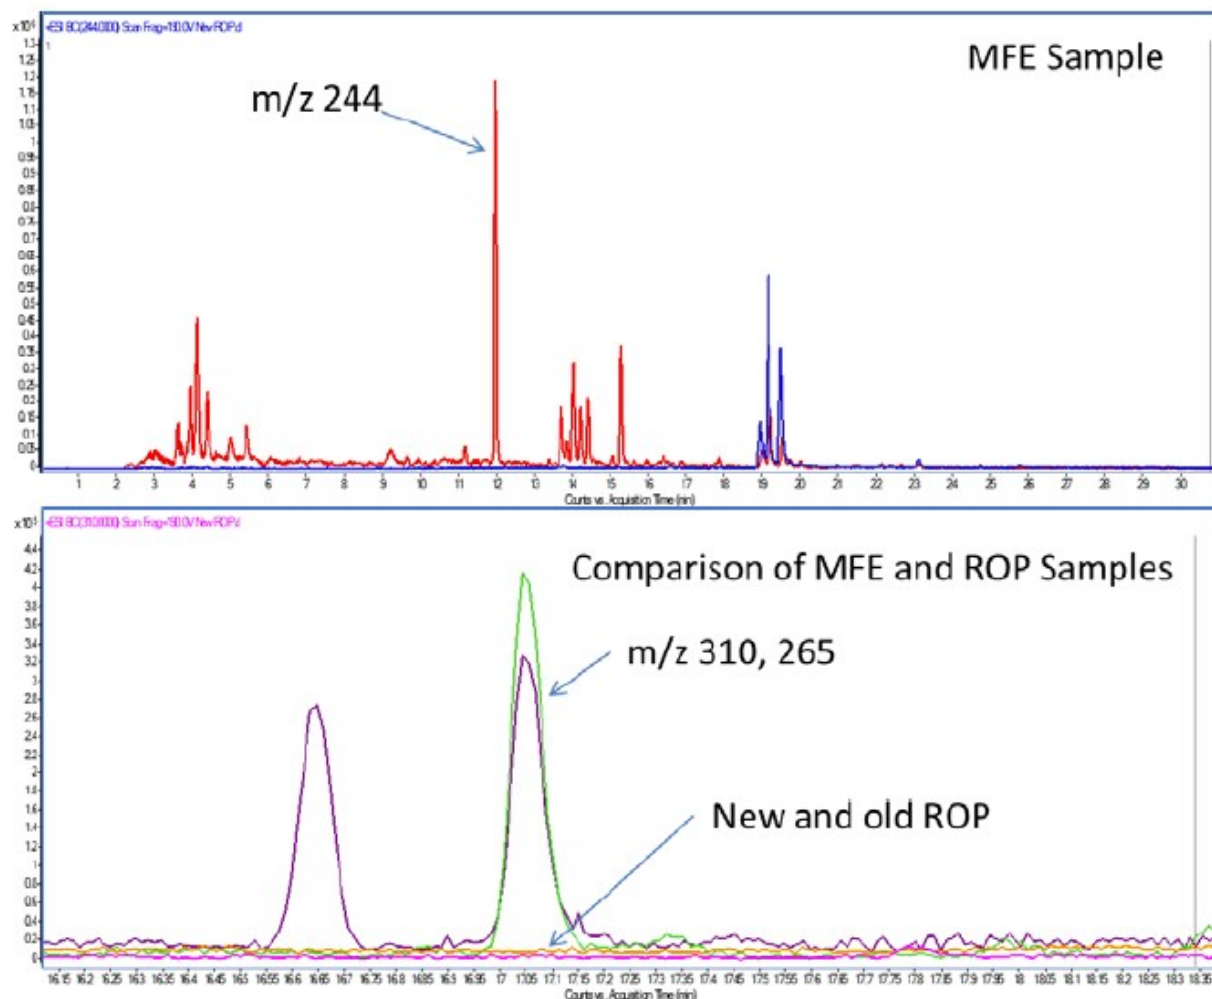

Figure SI-12. Top panel shows the extracted ion chromatograms for  $m/z$  244 (3-hydroxymorphinan) for the microfiltration effluent (red) and permeate from a newer membrane (blue) isolates. The permeate from the older membrane sample was similar, showing that this compound is well rejected by both newer and older membranes. Bottom panel shows extracted ion chromatograms for  $m/z$  310 (methadone, green) and its product ion,  $m/z$  265 (purple), showing good rejection of this compound by both the older (orange) and new (pink) RO membranes

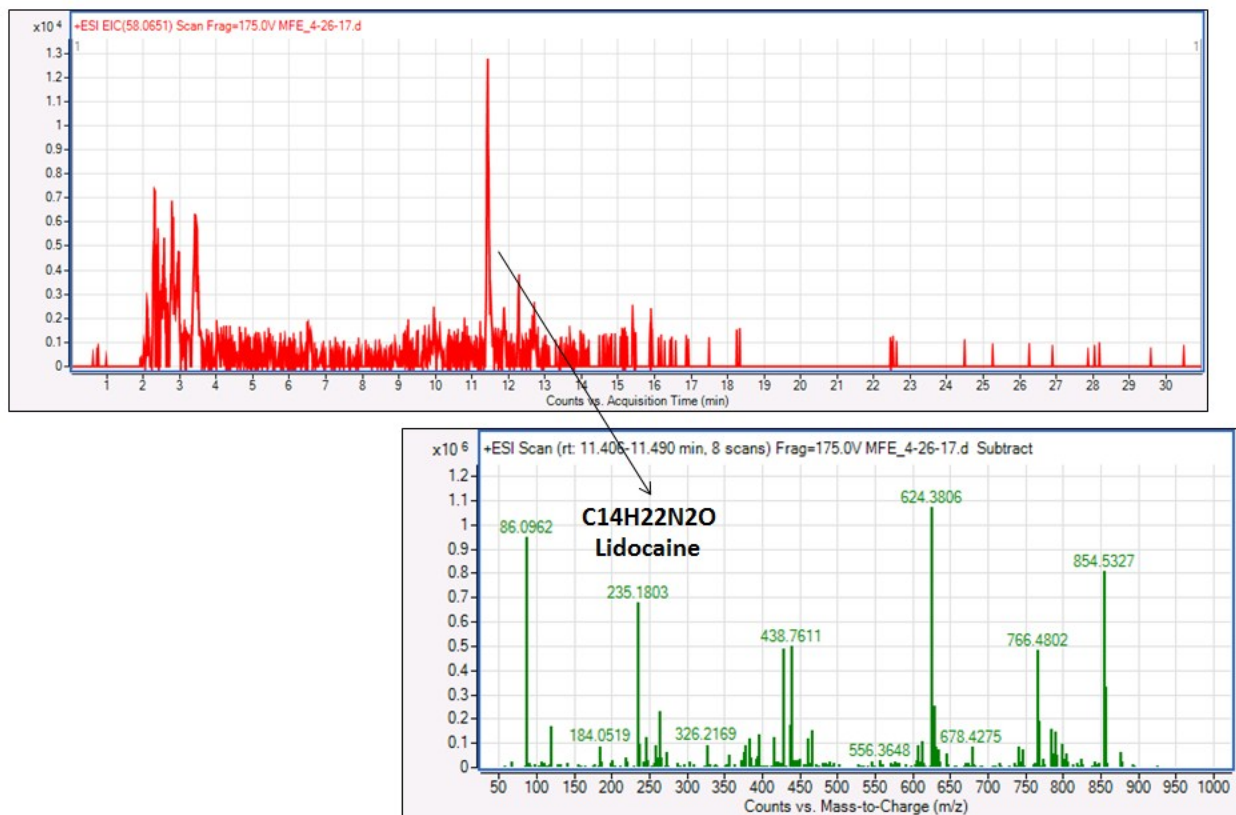

Figure SI-13. Extracted ion chromatogram of m/z 58.0651, tentatively identified as lidocaine

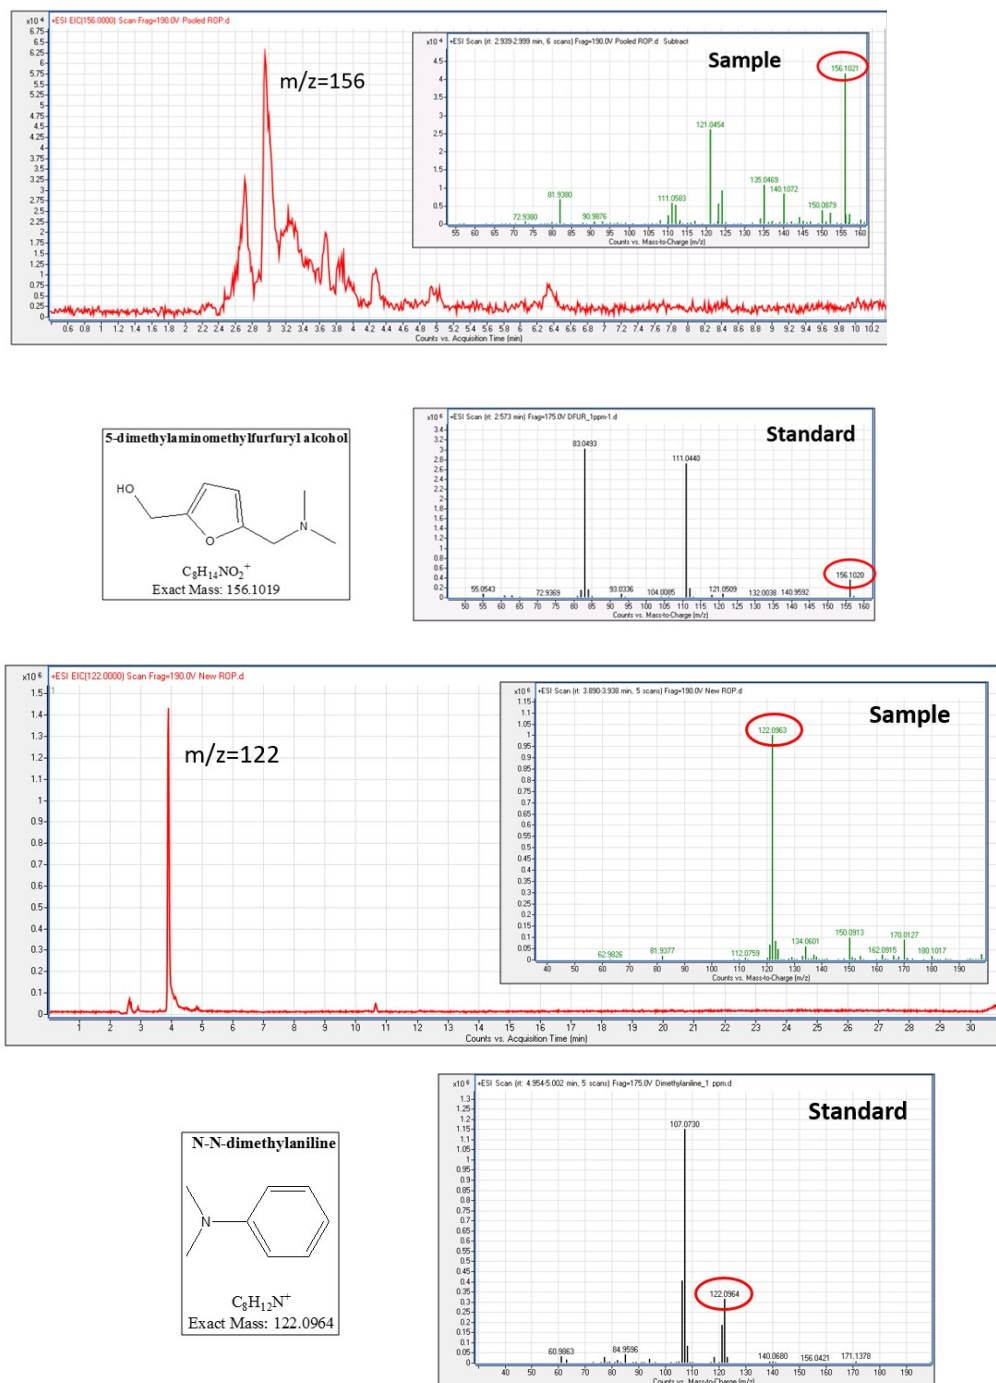

Figure SI-14. Extracted ion chromatograms and mass spectra for 5-dimethylaminomethylfurfuryl alcohol and *N-N*-dimethylaniline for both: samples and pure standards.

#### 4. Non-target Analysis to Detect NDMA Precursors Using N-nitrosamine Precursor Database (Section 3.6)

Table SI-2: Abundances (peak intensity) of NDMA precursor database matches in all samples.

| Name                                | Event 1                  | Event 2                  | Event 1                  | Event 2                  | Event 1                    | Event 2                    | Event 1                 | Event 2                 | Event 1     | Event 2     |
|-------------------------------------|--------------------------|--------------------------|--------------------------|--------------------------|----------------------------|----------------------------|-------------------------|-------------------------|-------------|-------------|
|                                     | Microfiltration Effluent | Microfiltration Effluent | New Membrane RO Permeate | New Membrane RO Permeate | Older Membrane RO Permeate | Older Membrane RO Permeate | RO Permeate (All units) | RO Permeate (All units) | UV Effluent | UV Effluent |
| 3-N,N-DAPSIS                        |                          | 281,594                  |                          |                          |                            |                            |                         |                         |             |             |
| Amiripryline                        |                          | 604,641                  |                          |                          |                            |                            |                         |                         |             |             |
| Azithromycin                        | 2,123,934                | 2,564,565                |                          |                          |                            |                            |                         |                         |             |             |
| Citalopram                          | 426,963                  | 687,116                  |                          |                          |                            |                            |                         |                         |             |             |
| Clarithromycin                      | 666,703                  | 608,977                  |                          |                          |                            |                            |                         |                         |             |             |
| DEET                                | 1,899,831                | 1,560,950                | 18,668                   | 19,830                   | 25,933                     | 22,729                     | 30,852                  | 16,996                  | 16,248      | 12,740      |
| Des-venlafaxine                     |                          | 1,443,480                |                          |                          |                            |                            |                         |                         |             |             |
| Diltiazem                           | 173,739                  |                          |                          |                          |                            |                            |                         |                         |             |             |
| Dimethylaminoacetonitrile           |                          | 295,393                  |                          |                          |                            | 66,560                     |                         |                         |             |             |
| Dimethylaminoethanol                |                          | 101,177                  |                          |                          |                            |                            |                         |                         |             |             |
| Dimethylphenethylamine              |                          | 30,851                   |                          |                          |                            |                            |                         |                         |             |             |
| Dimethyltert-butylamine             |                          | 401,626                  |                          |                          |                            |                            |                         |                         |             |             |
| Diphenhydramine                     | 71,026                   | 142,941                  |                          |                          |                            |                            |                         |                         |             |             |
| Dimethylaminomethylfurfuryl alcohol |                          |                          | 44,931                   |                          | 37,162                     |                            | 47,835                  |                         | 11,181      |             |
| Diuron                              | 11,865                   | 26,448                   |                          |                          |                            |                            |                         |                         |             |             |
| Lidocaine                           |                          | 1,406,411                |                          |                          |                            |                            |                         |                         |             |             |
| Methyl Orange                       |                          | 42,096                   |                          |                          |                            |                            |                         |                         |             |             |
| Methylene blue                      |                          | 63,109                   |                          |                          |                            |                            |                         |                         |             |             |
| N,N-Dimethylaniline                 |                          | 149,283                  | 1,360,711                |                          | 1,009,927                  |                            | 1,017,559               |                         | 1,821,715   |             |
| N,N-Dimethylbutylamine              |                          | 401,626                  |                          |                          |                            |                            |                         |                         |             |             |
| N,N-Dimethylisopropylamine          |                          | 28,243                   |                          |                          |                            |                            |                         |                         |             |             |
| Tramadol                            | 1,277,428                | 957,344                  |                          |                          |                            |                            |                         |                         |             |             |
| Venlafaxine                         | 838,086                  | 726,329                  |                          |                          |                            |                            |                         |                         |             |             |

## 5. Non-target Analysis to Detect Trace Organics Using a Proprietary Database of Anthropogenic Chemicals (Section 3.7)

Table SI-3: Abundances (peak intensity) of pharmaceutical and pesticide database matches in all samples.

| Name                     | Event 1                  | Event 2                  | Event 1                 | Event 2                 | Event 1                 | Event 2                 | Event 1                 | Event 2                 | Event 1     | Event 2     |
|--------------------------|--------------------------|--------------------------|-------------------------|-------------------------|-------------------------|-------------------------|-------------------------|-------------------------|-------------|-------------|
|                          | Microfiltration Effluent | Microfiltration Effluent | RO Permeate B01 (Newer) | RO Permeate B01 (Newer) | RO Permeate E01 (older) | RO Permeate E01 (older) | RO Permeate (All units) | RO Permeate (All units) | UV Effluent | UV Effluent |
| Acetaminophen            | 159,992                  | 22,486                   |                         |                         |                         |                         |                         |                         |             |             |
| Albuterol                | 136,287                  | 105,613                  |                         |                         |                         |                         |                         |                         |             |             |
| Atenolol                 | 3,834,006                | 2,457,727                |                         |                         | 70,539                  | 27,447                  | 65,654                  |                         |             |             |
| Azithromycin             | 2,124,461                | 2,568,228                |                         |                         |                         |                         |                         |                         |             |             |
| Azoxystrobin             | 51,382                   | 38,629                   |                         |                         |                         |                         |                         |                         |             |             |
| Bupropion Metabolite     | 1,079,520                | 1,212,815                |                         |                         |                         |                         |                         |                         |             |             |
| Caffeine                 | 272,752                  | 118,482                  |                         |                         |                         |                         |                         |                         |             |             |
| Carbamazepine            | 966,202                  | 1,327,117                |                         |                         |                         |                         |                         |                         |             |             |
| 10-Hydroxy-carbamazepine | 1,008,311                | 258,166                  |                         |                         |                         |                         |                         |                         |             |             |
| Carbendazim              | 383,495                  | 363,764                  |                         |                         | 36,134                  | 27,102                  | 25,226                  |                         |             |             |
| Clarithromycin           | 667,145                  | 610,717                  |                         |                         |                         |                         |                         |                         |             |             |
| DEET                     | 1,899,831                | 1,560,950                | 18,668                  | 19,830                  | 25,933                  | 22,729                  | 30,852                  | 16,996                  | 16,248      | 12,740      |
| Dehydronifedipine        | 95,532                   | 91,908                   |                         |                         |                         |                         |                         |                         |             |             |
| Desmethyl-venlafaxine    | 2,313,337                | 1,443,480                |                         |                         |                         |                         |                         |                         |             |             |
| Dextromethorphan         | 748,560                  | 1,002,000                |                         |                         |                         |                         |                         |                         |             |             |
| Dextrophan               | 5,252,477                | 4,508,742                | 10,784                  | 14,934                  | 28,146                  | 22,610                  | 26,058                  | 14,089                  |             |             |
| Diphenhydramine          | 71,026                   | 142,941                  |                         |                         |                         |                         |                         |                         |             |             |
| Diuron                   | 11,865                   | 25,809                   |                         |                         |                         |                         |                         |                         |             |             |
| Erythromycin             | 175,425                  | 238,246                  |                         |                         |                         |                         |                         |                         |             |             |
| Erythromycin Anhydrate   | 333,239                  | 243,324                  |                         |                         |                         |                         |                         |                         |             |             |
| Fluoxetine               |                          | 26,031                   |                         |                         |                         |                         |                         |                         |             |             |
| Fluridone                |                          | 17,747                   |                         |                         |                         |                         |                         |                         |             |             |
| Gabapentin               | 801,399                  | 262,721                  |                         |                         |                         |                         |                         |                         |             |             |
| Imazalil                 | 35,357                   | 20,836                   |                         |                         |                         |                         |                         |                         |             |             |
| Lamotrigine              | 3,218,367                | 2,072,689                | 40,527                  | 38,639                  | 218,378                 | 149,425                 | 204,918                 | 49,455                  | 32,058      | 6,848       |
| Lamotrigine Glucuronide  | 54,905                   | 28,733                   |                         |                         |                         |                         |                         |                         |             |             |
| Methadone                | 407,130                  | 302,423                  |                         |                         |                         |                         |                         |                         |             |             |
| Metoprolol               | 4,466,477                | 3,028,674                | 24,194                  | 16,586                  | 153,802                 | 73,134                  | 147,962                 | 23,444                  |             |             |
| Oxycodone                | 88,710                   | 77,141                   |                         |                         |                         |                         |                         |                         |             |             |
| Parathion-methyl         |                          | 15,688                   |                         |                         |                         |                         |                         |                         |             |             |
| Prometon                 |                          | 540,122                  |                         |                         |                         |                         |                         |                         |             |             |
| Propazine                |                          | 124,400                  |                         |                         |                         |                         |                         |                         |             |             |
| Propranolol              | 277,912                  | 217,909                  |                         |                         |                         |                         |                         |                         |             |             |
| Simazine                 |                          | 43,184                   |                         |                         |                         |                         |                         |                         |             |             |
| Sucralose                | 38,038                   | 43,335                   |                         |                         |                         |                         |                         |                         |             |             |
| Sulfamethoxazole         | 58,014                   | 98,022                   |                         | 10,162                  |                         | 6,094                   |                         | 7,575                   |             | 11,708      |
| Terbuthylazine           | 80,403                   | 124,517                  |                         |                         |                         |                         |                         |                         |             |             |
| Thiabendazole            | 359,778                  | 294,223                  | 16,663                  | 13,104                  | 74,822                  | 42,946                  | 50,144                  | 10,114                  |             |             |
| Tramadol                 | 1,277,428                | 957,344                  |                         |                         |                         |                         |                         |                         |             |             |
| Trimethoprim             | 1,926,449                | 1,216,299                |                         | 8,683                   | 41,976                  | 38,459                  | 49,950                  | 10,712                  |             |             |
| Venlafaxine              | 838,086                  | 726,329                  |                         |                         |                         |                         |                         |                         |             |             |
